# Supplementary material
Source: PubMed Central journal article supplement (PMC11589546)
Supplement: JTCM-44-6-1194-s1.pdf [file JTCM-44-6-1194-s1.pdf]

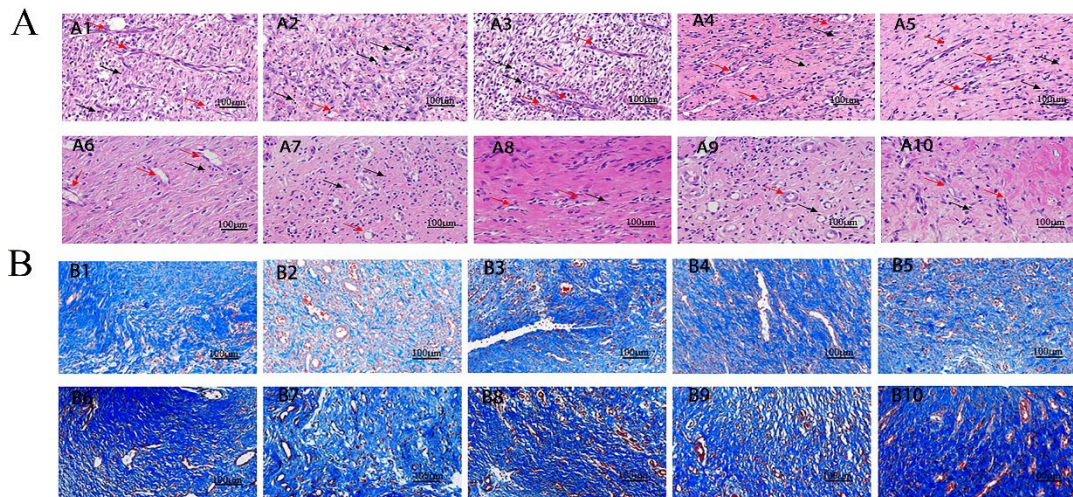

Supplementary Figure 1 Pathological sections of wound in rats

A1-A5: representative images of HE staining of skin wounds at days 7 after surgery from all Groups. A6-A10: representative images of HE staining of skin wounds at days 14 after surgery from all groups. Red arrows indicate capillary vessels and black arrows indicate inflammatory cell infiltration. B1-B5: representative images of Masson staining of skin wounds at days 7 after surgery from all groups. B6-B10: Representative images of Masson staining of skin wounds at days 14 after surgery from all groups. A1, A6, B1, B6: Normal group; A2, A7, B2, B7: Model group; A3, A8, B3, B8: ZYP group; A4, A9, B4, B9: rhEGF group; A5, A10, B5, B10: SSD group. HE: hematoxylin eosin staining ( $\times 100$ ); Masson: Masson's trichrome staining ( $\times 100$ ). ZYP: Zuyangping; rhEGF: epidermal growth factor; SSD: 1% sulfadiazine silver cream. Normal group: Normal rats with skin ulcer; Model group: Non-intervention group after the establishment of diabetic ulcer model; ZYP group: after modelling diabetic ulcer, treatment with ZYP formula; rhEGF group: after modelling diabetic ulcer, treatment with epidermal growth factor; SSD group: after modelling diabetic ulcer, treatment with 1% sulfadiazine silver cream.
